# Supplementary material
Source: PubMed Central journal article supplement (PMC9202428)
Supplement: iai.00041-22-s0002.pdf [file iai.00041-22-s0002.pdf]

## Supplementary Methods

### **Construction of recombinant *Salmonella* Typhimurium 14028s strains**

Recombineering constructs were designed using Benchling's cloud-based software platform and were engineered with primers synthesized by Integrated DNA Technologies (**supplementary table 2**). Plasmids used in fluorescent reporter strain construction were obtained through Addgene.org and are listed in **supplementary table 1**.

### *Salmonella* Typhimurium 14028s $\Delta$ *hilD* strain construction

An unmarked *hilD* deletion was engineered into the *Salmonella* Typhimurium 14028s (STm 14028s) genetic background (**PMID: 19897643**) using the FRUIT method of recombineering (**PMID: 23028641**). Briefly, a recombination fragment was created by amplifying the *thyA* cassette from pAMD001 (**PMID: 23028641**) using Quick-load Taq 2x Master Mix (New England Biolabs) and tailed primers (*hilD\_KO\_TU\_F* & *hilD\_KO\_TD\_R*) designed to delete the entire *hilD* open reading frame (ORF). The resulting *hilD-thyA* recombination fragment was gel extracted via Thermo's GeneJET kit and subsequently electrotransformed into ST14028s  $\Delta$ *thyA* harboring pKD46 (**PMID: 23028641**) that had been cultured at 30 °C in LB broth supplemented with carbenicillin and 0.2% arabinose to promote lambda Red-mediated recombination. Recombinants were then selected at 30°C on M9 agar supplemented with 1 % casamino acids and 100 µg/ml carbenicillin as previously described (**PMID: 23028641**). Colonies that emerged were replated on the same media to confirm the loss of thymine auxotrophy, and then screened via colony PCR using Quick-load Taq 2x Master Mix (New England Biolabs) and the *hilD\_KO\_scrn\_F1* & *hilD\_KO\_Scrn\_R1* primer set to confirm replacement of the *hilD* ORF with *thyA*. The resulting ST14028s  $\Delta$ *thyA*  $\Delta$ *hilD::thyA* intermediate strain was then subjected to a second round of lambda Red recombination to generate the scarless *hilD* deletion strain. To accomplish this, ~200 bp regions immediately upstream and downstream of the *hilD* ORF were first amplified using Quick-load Taq 2x Master Mix and the *hilD\_KO\_scrn\_F1/hilD\_KO\_MU\_R* and

hilD\_KO\_MU\_F/hilD\_KO\_Scrn\_R1 primer sets. The amplified DNA fragments were then gel purified via Thermo's GeneJET kit and used as templates for overlap extension PCR with Q5 High-Fidelity 2x Master Mix (New England Biolabs) and the hilD\_KO\_scrn\_F1/hilD\_KO\_Scrn\_R1 primer set. The resulting PCR fusion product was then purified via Zymo Research's DNA Clean & Concentrator-5 kit and then electrotransformed into ST14028s  $\Delta thyA \Delta hilD::thyA$  + pKD46 cells that had been cultured at 30 °C in LB carbenicillin broth supplemented with 0.2 % arabinose to induce recombination. Recombinants were then selected at 30 °C on M9 agar supplemented with 1 % casamino acids, 100 µg/ml carbenicillin, 100 µg/ml thymine, and 20 µg/ml trimethoprim as previously described (**PMID: 23028641**). The colonies that emerged following overnight incubation were passaged again on the same media to confirm trimethoprim resistance, and then screened by PCR to confirm removal of *thyA* from the *hilD* locus using Quick-load Taq 2x Master Mix (New England Biolabs) and the hilD\_KO\_scrn\_F2 & hilD\_KO\_scrn\_R2 primer set. The STm 14028s  $\Delta thyA \Delta hilD$  intermediate strain that resulted was then subjected to a third round of lambda Red recombination to restore the native *thyA* ORF as previously described (**PMID: 23028641**). Both the *thyA* and  $\Delta hilD$  loci were then sequenced to confirm successful recombination using the hilD\_KO\_scrn\_F2/hilD\_KO\_scrn\_R2 primer sets. The resulting STm 14028s  $\Delta hilD$  strain was then cured of pKD46 through passage on LB agar at 42 °C prior to experimentation.

#### Creation of *Salmonella* Typhimurium fluorescent reporter strains

Constitutive *sGFP2* and *mScarlet-I* reporter cassettes were stably integrated into the chromosome of *Salmonella* Typhimurium strains through Tn7 transposition (**PMID: 27260360**) (**PMID: 30631309**). To accomplish this, STm 14028s WT,  $\Delta oafA$  (**PMID: 23028641**), and  $\Delta hilD$  genetic backgrounds were electroporated with either pMRE-Tn7-152 (*sGFP2*) or pMRE-Tn7-145 (*mScarlet-I*) (**PMID: 30631309**) and transformants were selected for at 30 °C on LB agar containing carbenicillin and 0.2 % arabinose to induce TN7 transposition. Individual colonies that

emerged were picked and grown in antibiotic-free LB broth at 42 °C and 225 RPM to promote loss of the Tn7 plasmids. Four hours later the cultures were plated on LB agar supplemented with either kanamycin (pMRE-Tn7-152-sGFP2), or gentamycin (pMRE-Tn7-145 mScarlet-I) and then incubated overnight at 37 °C to select for recombinants harboring chromosomally integrated reporter cassettes. Transformants that emerged the following day were patch-plated on LB carbenicillin and either LB kanamycin or LB gentamycin and incubated overnight at 30 °C to confirm loss of the temperature-sensitive plasmids and chromosomal integration of the reporter cassettes. Recombinants were then assessed for fluorescence via Spectramax ID3 plate reader and customized excitation/emission spectra (sGFP2: 480nm/530nm, mScarlet-I: 570nm/620nm).

### Supplementary Data

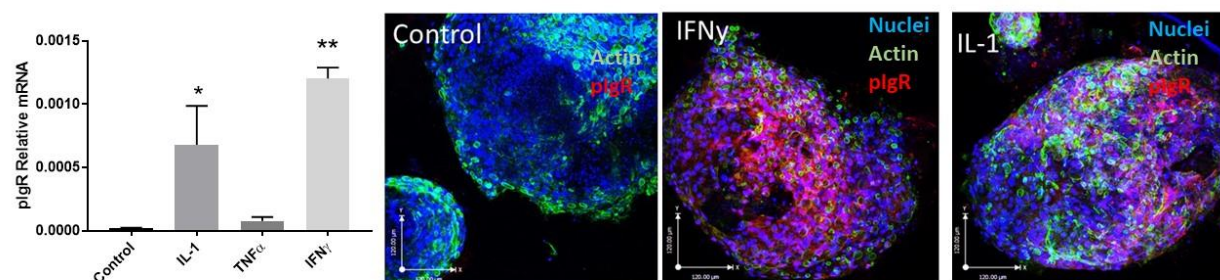

**Supplementary Figure 1:** preliminary experiment to determine best plgR induction in HIOs. Results show both IL-1 and IFN $\gamma$  significantly increase plgR mRNA, but IFN $\gamma$  also causes tight junction disruption (confocal image, second panel). IL-1 leaves tight junction intact.

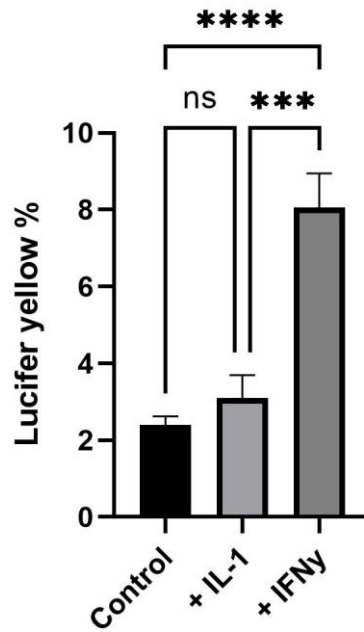

**Supplementary Figure 2:** preliminary experiment to determine best pIgR induction in HIOs. Results show both IFN $\gamma$  significantly increases Lucifer Yellow permeability in HIOs whereas IL-1 does not increase Lucifer Yellow permeability

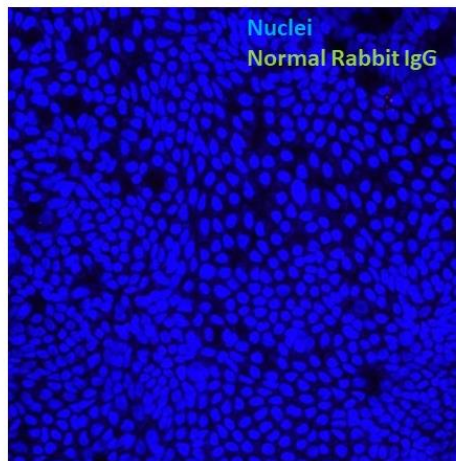

**Supplementary Figure 3:** Normal IgG control staining to show GP2 specificity
